# Supplementary material for: A Comparative Analysis of 5-Azacytidine- and Zebularine-Induced DNA Demethylation
Source: PubMed Central journal article supplement (PMC5015934; doi:10.1534/g3.116.030262), 2016-07-05
Supplement: supp_g3.116.030262_FigureS1.pdf [file supp_g3.116.030262_FigureS1.pdf]

**A**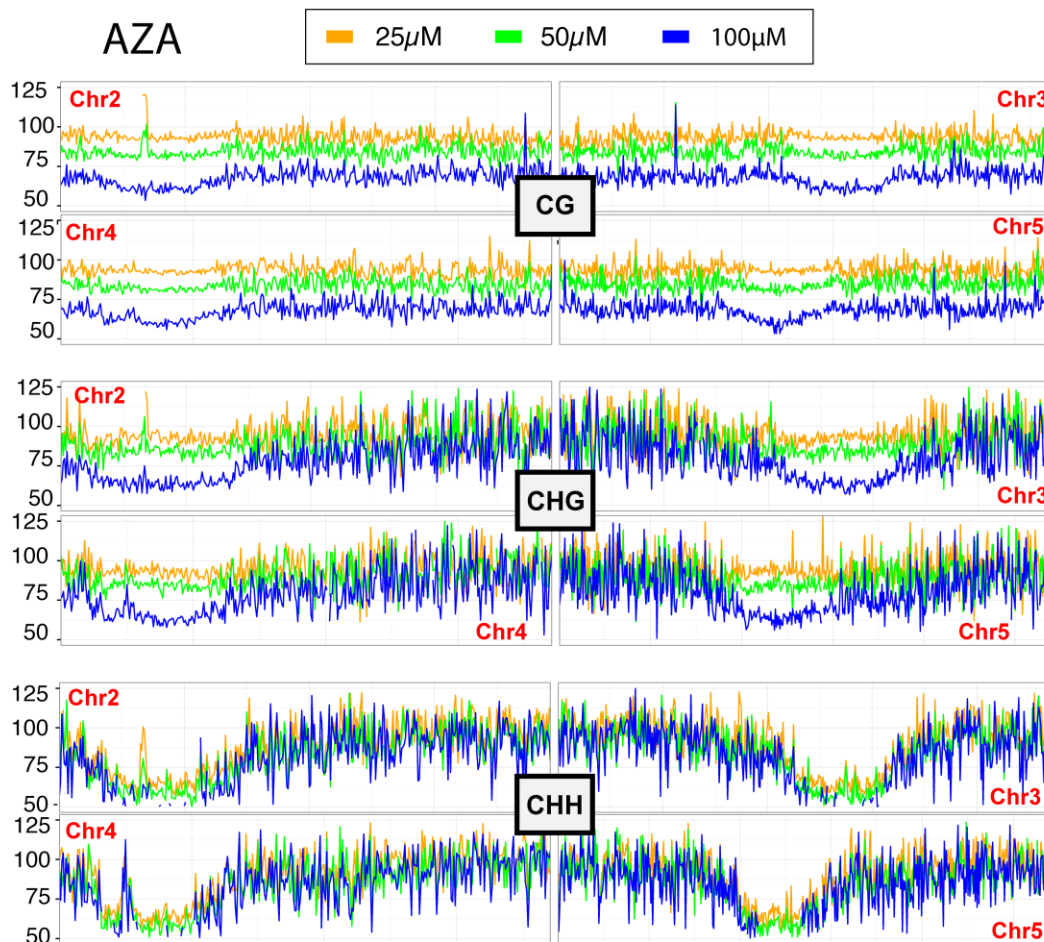**B**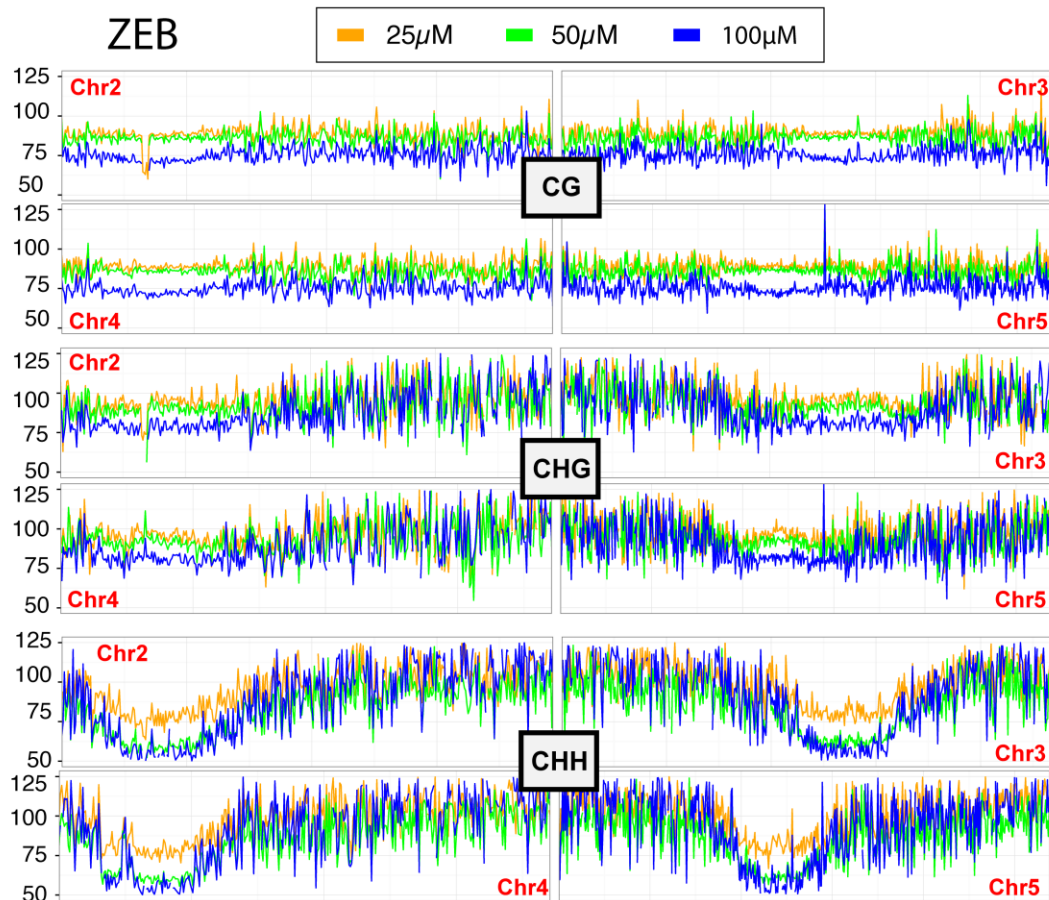

**Figure S1 | DNA methylation across all chromosomes is decreased when treated with AZA and ZEB in a concentration-dependent fashion**

A-B. Relative methylation level shown across chromosomes 2-4 (chromosome 1 shown in Figure 2B) for AZA-treated (S1A) and ZEB-treated (S1B) seedlings.
